# Supplementary material
Source: publisher site journal article supplement (https://www.dovepress.com/article/421449)
Supplement: Supplementary file 1 [file get_supplementary_file.php]

**
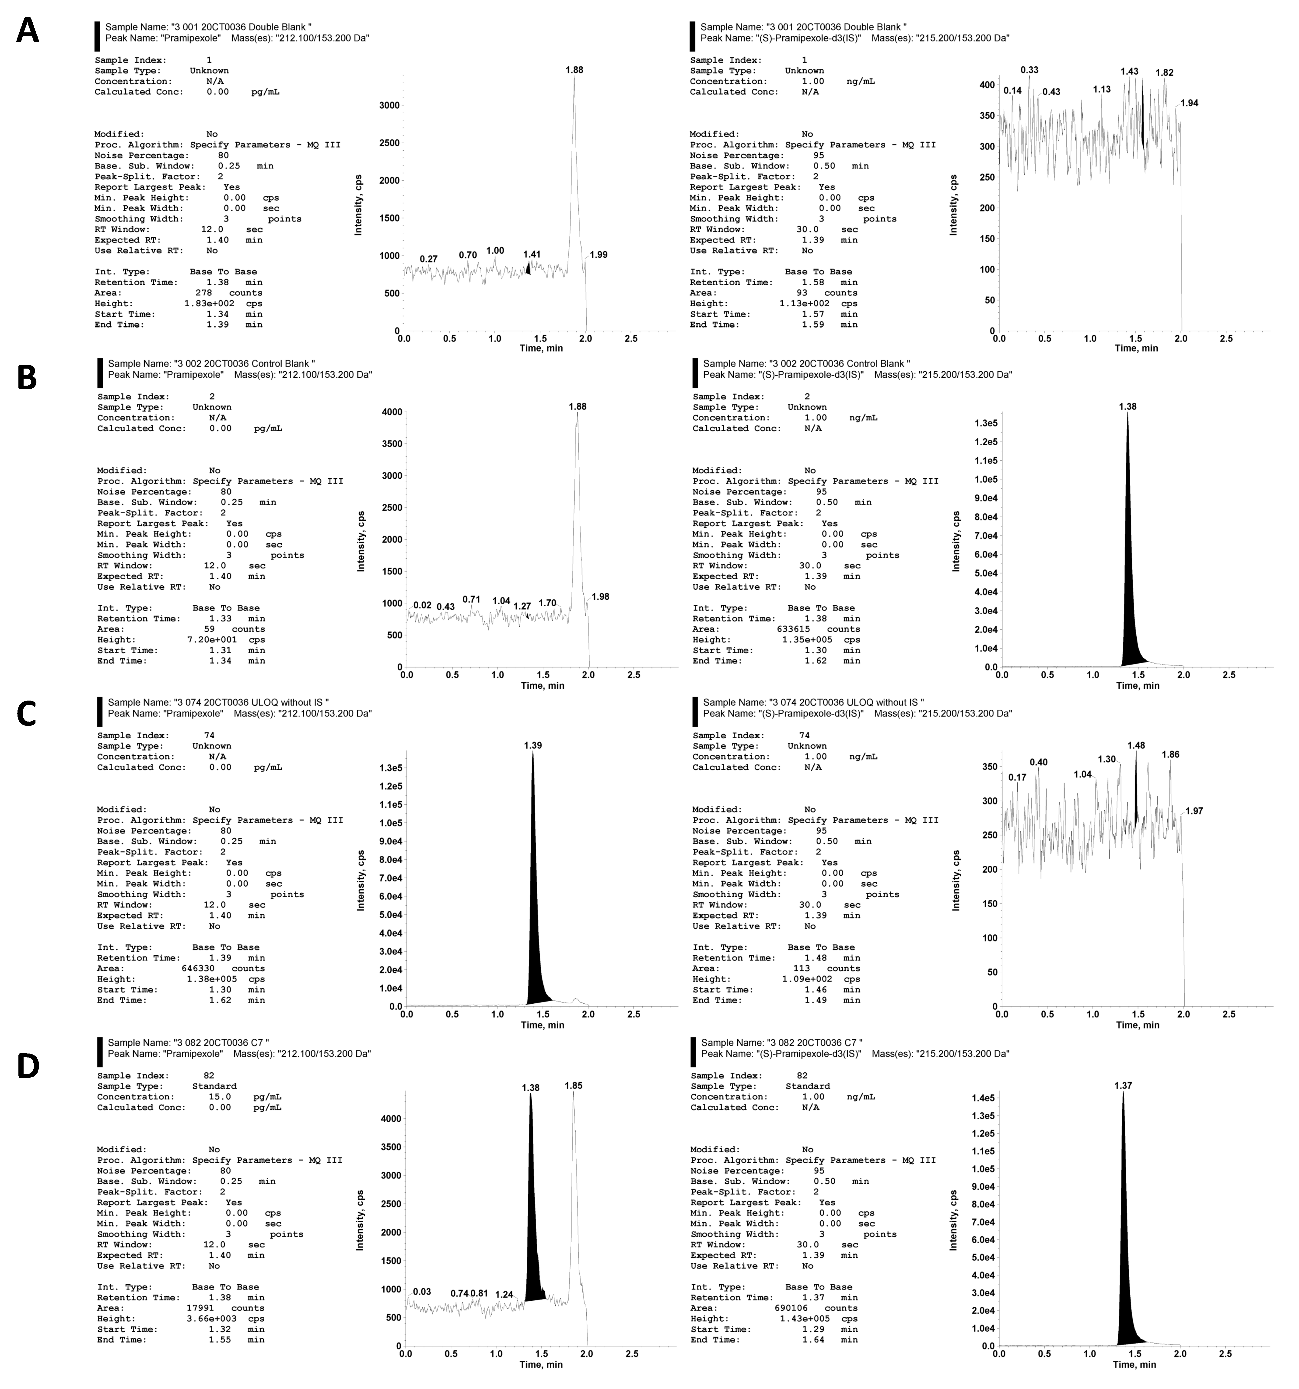
**

**Supplementary Figure 1** Typical chromatograms of plasma pramipexole (left) and IS (right).

**Notes:** Chromatograms of pramipexole (left) and IS (right) in (A) double blank plasma sample; (B)control blank plasma containing IS; (C) standard curve sample without IS at ULOQ level; and (D) standard curve sample with IS at LLOQ level.

**Abbreviations:** IS, internal standard; ULOQ, upper limit of quantification; LLOQ, lower limit of quantitation.
